# Supplementary material for: NetPyNE, a tool for data-driven multiscale modeling of brain circuits
Source: eLife journal article supplement (doi:10.7554/elife.44494), 2019-04-26
Supplement: supp [file elife-44494-supp-v1.zip]

Archive with 1 entries (1 files):
- elife_poa_e44494_Transparent_Reporting_File.pdf
